# Supplementary material for: Fractionation of beech wood cell walls into digestible cellulose-rich residues and photoluminescent lignin-rich precipitates via semi-flow hot-compressed water treatment with 2-naphthol
Source: Royal Society of Chemistry journal article supplement (doi:10.1039/d4ra03094j), 2024-01-01
Supplement: d4ra03094j1.pdf [file d4ra03094j1.pdf]

1

**Supporting Information for**

2

**Fractionation of beech wood cell walls into digestible cellulose-rich residues and**

3

**photoluminescent lignin-rich precipitates via semi-flow hot-compressed water treatment**

4

**with 2-naphthol**

5

6 Masatsugu Takada,<sup>\*a</sup> Yutaka Okazaki,<sup>b</sup> Shinya Kajita,<sup>a</sup> Haruo Kawamoto,<sup>b</sup> and Takashi

7 Sagawa<sup>b</sup>

8

9 a Graduate School of Bio-Applications and Systems Engineering (BASE), Tokyo

10 University of Agriculture and Technology, 2-24-16, Nakacho Koganeishi, Tokyo 184-

11 8588, Japan

12 b Graduate School of Energy Science, Kyoto University, Yoshida-Honmachi, Kyoto

13 606-8501, Japan

14

15 \*Corresponding authors:

16 Dr. M. Takada; [takada-masatsugu@go.tuat.ac.jp](mailto:takada-masatsugu@go.tuat.ac.jp)

17

18

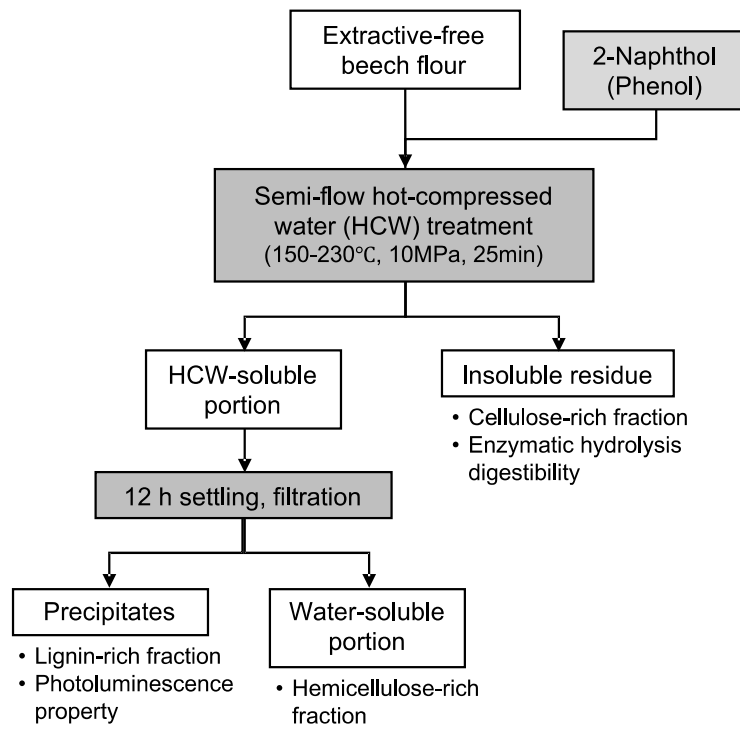

19

20 Figure S1 Schematic images of fractionation of beech wood by semi-flow hot-

21

compressed water (HCW) treatment.

22

23

24

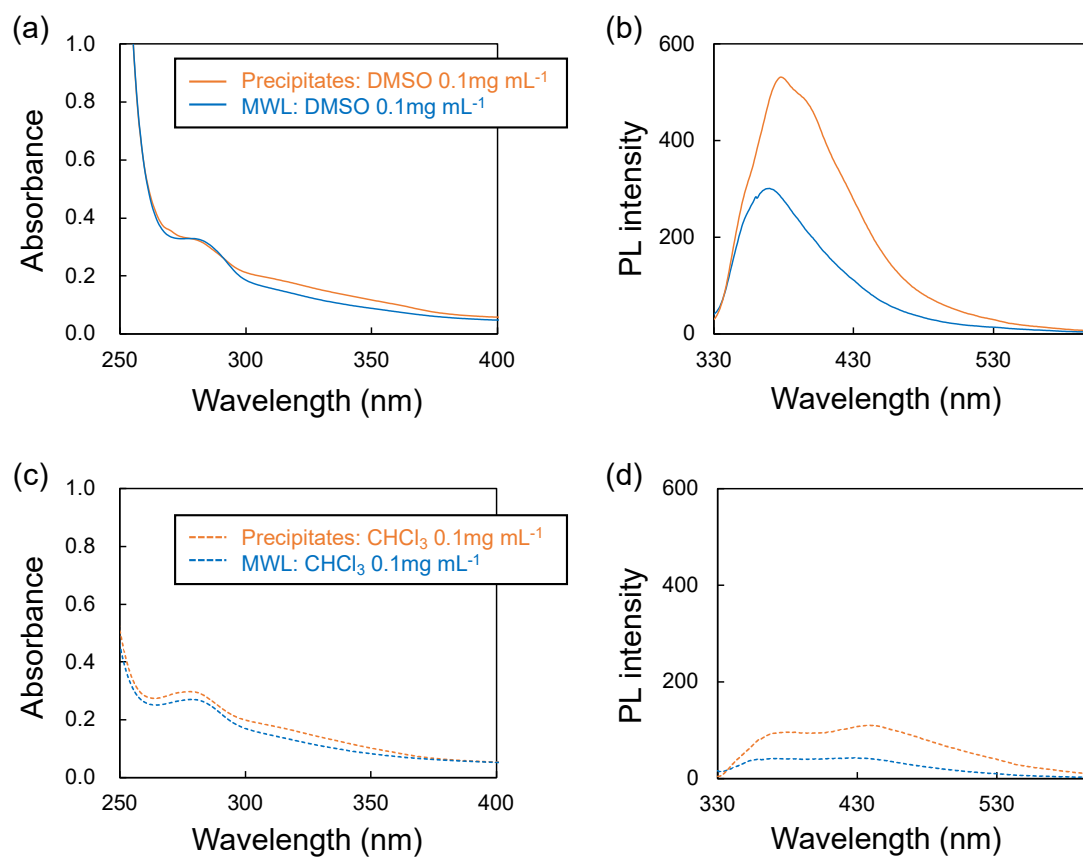

25

26 Figure S2 (a) UV-Vis absorbance spectra of MWL and precipitates from HCW

27 treatment dissolved in DMSO at 0.1 mg mL<sup>-1</sup>, (b) those photoluminescence spectra

28 excited at 320 nm, (c) UV-Vis absorption spectra of MWL and precipitates in CHCl<sub>3</sub> at

29 0.1 mg mL<sup>-1</sup>, (d) those photoluminescence spectra excited at 320 nm.

30

31

(a) Pictures

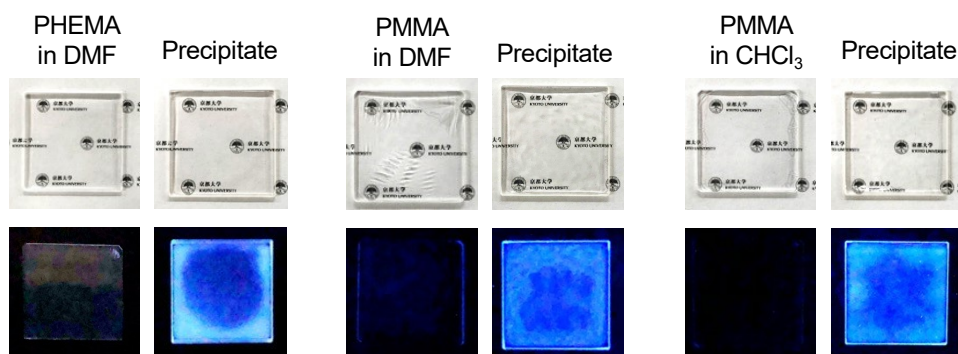

(b) UV-Vis absorbance spectra

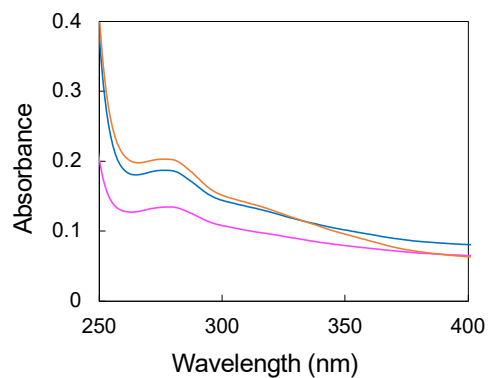

(c) Normalized PL spectra excited at 320 nm

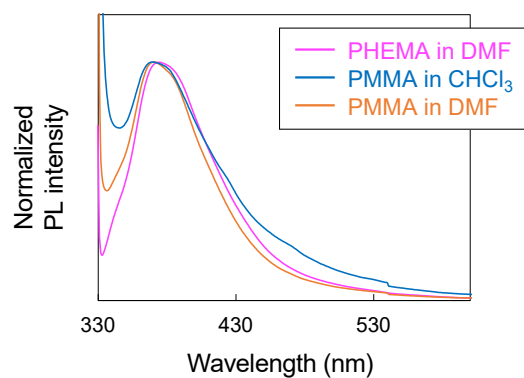

32

33 Figure S3 (a) Photos of precipitates from HCW treatment of beech wood in PHEMA

34 and PMMA films, (b) their UV-Vis absorption spectra, (c) PL spectra excited at 320 nm.

35

36

37

38

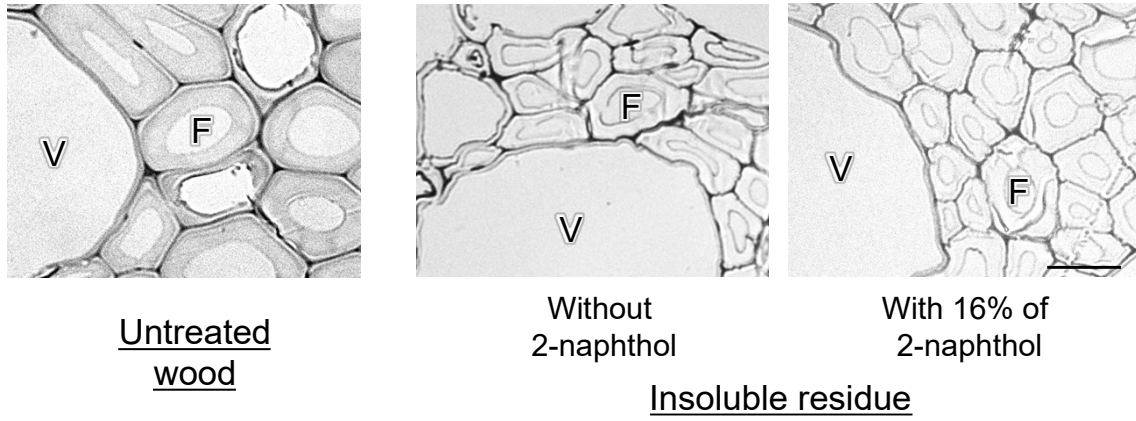

39

40 Figure S4 UV micrographs of insoluble residue from Japanese beech as treated by HCW

41 with 16% 2-naphthol.

42

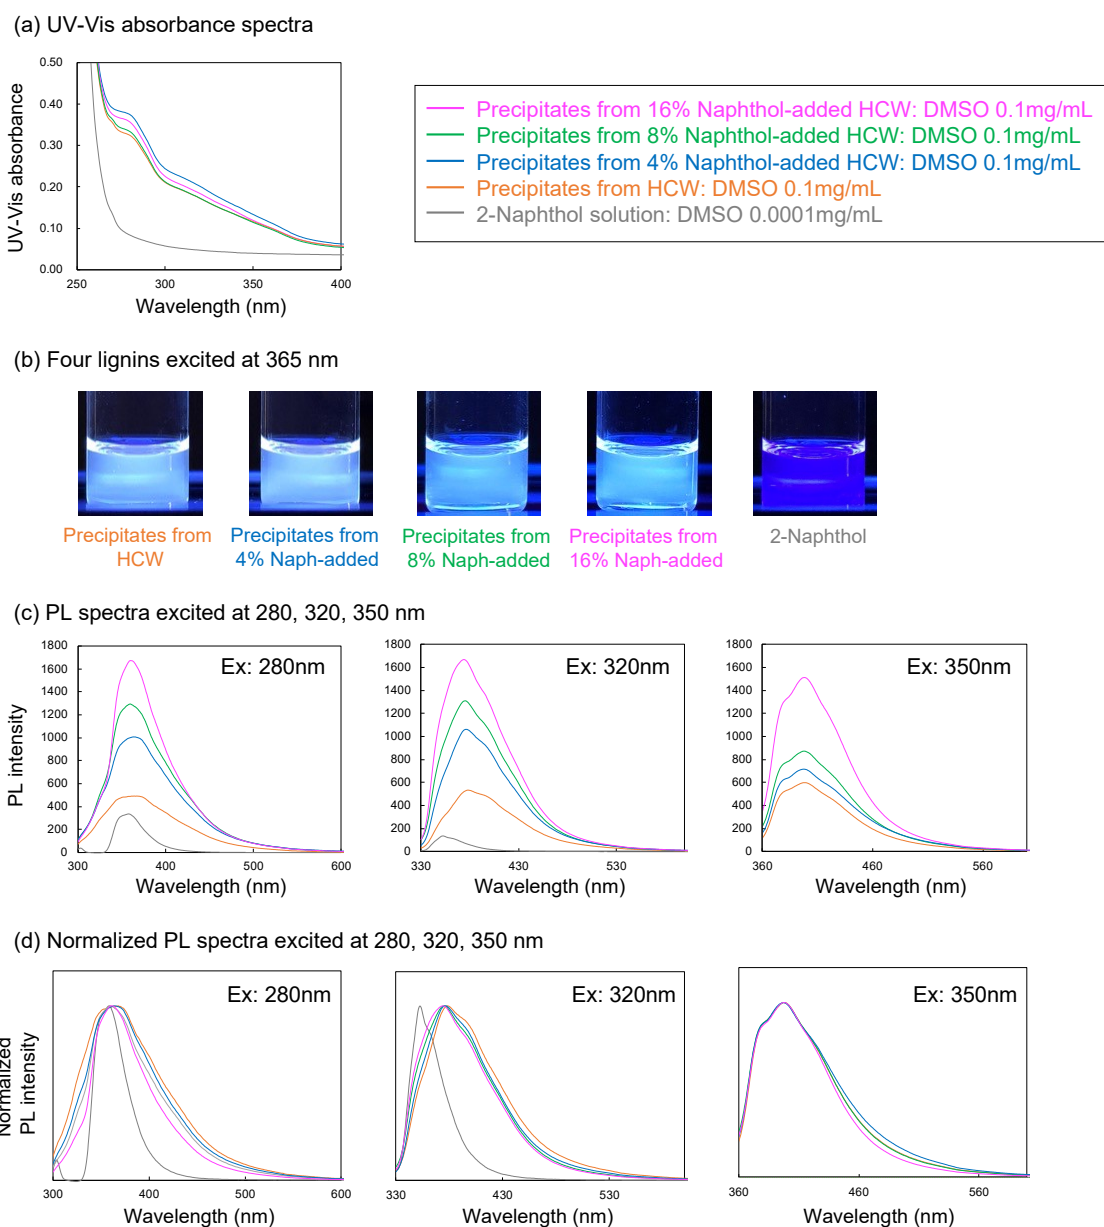

43

44 Figure S5 (a) UV-Vis absorption spectra of precipitates from hot-compressed water

45 treatment with 0%, 4%, 8%, and 16% of 2-naphthol dissolved in DMSO at 0.1 mg mL<sup>-1</sup>.

46 (b) those pictures excited at 365 nm, (c) photoluminescence spectra excited at 280, 320,

47 350 nm, and (d) their normalized spectra.

48

49

50

(a) UV-Vis absorbance spectra

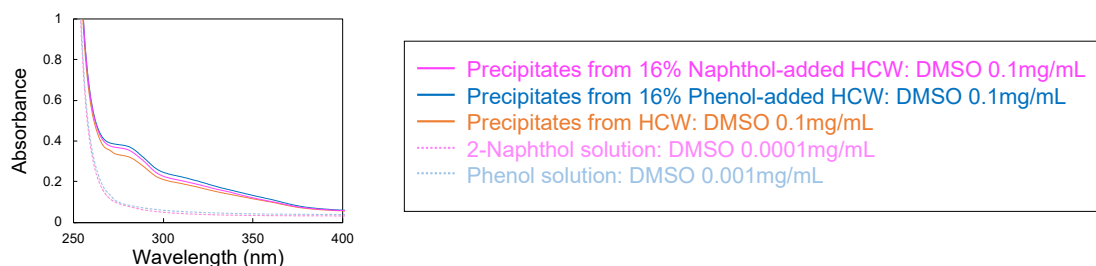

(b) PL spectra excited at 280, 320, 350 nm

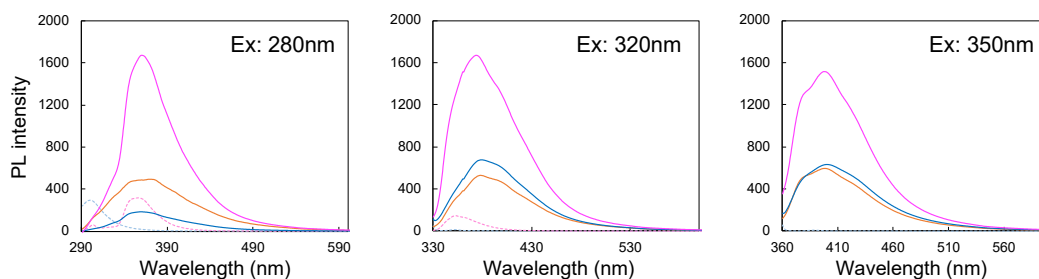

(c) Normalized PL spectra excited at 280, 320, 350 nm

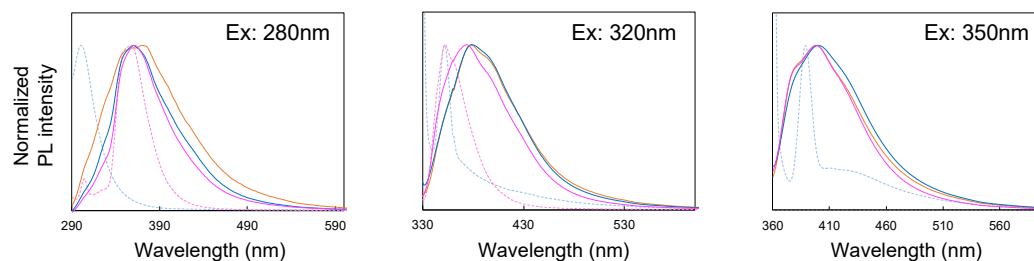

51

52 Figure S6 (a) UV-Vis absorption spectra of precipitates from hot-compressed water

53 with/without addition of 16% 2-naphthol or phenol, dissolved in DMSO at 0.1 mg mL<sup>-1</sup>.

54 (b) photoluminescence spectra excited at 280, 320 and 350 nm, (c) their normalized

55 spectra.

56

57

58 Table S1 Average molecular weight of precipitates and MWL detected by gel

59 permeation chromatography.

| Sample       | Mw    | Mn    |
|--------------|-------|-------|
| Precipitates | 3,670 | 1,180 |
| MWL          | 7,180 | 3,230 |

60

61

62 Table S2 Fluorescence lifetime of precipitates by HCW treatment with/without 2-

63 naphthol excited at 373 nm.

| Sample<br>in DMF | Fluorescence<br>Life time<br>( $\tau$ ) |
|------------------|-----------------------------------------|
| Prec(0%)         | 2.84                                    |
| Prec(16%)        | 3.16                                    |
| 2-naphthol       | 4.56                                    |

64

65
